# Supplementary material for: Mechanically Robust and Flexible GO/PI Hybrid Aerogels as Highly Efficient Oil Absorbents
Source: MDPI journal article supplement (doi:10.3390/polym14224903), 2022-11-13
Supplement: s1 [file s1]

## Supporting information

# Mechanically Robust and Flexible GO/PI Hybrid Aerogels as Highly Efficient Oil Absorbents

Li Zhang, Yuting Wang \*, Ruidong Wang, Penggang Yin and Juntao Wu \*

Key Laboratory of Bio-Inspired Smart Interfacial Science and Technology of Ministry of Education, School of Chemistry, Beihang University, Beijing 100191, China

\*Correspondence: wangyt@buaa.edu.cn (Y.W.); wjt@buaa.edu.cn (J.W.)

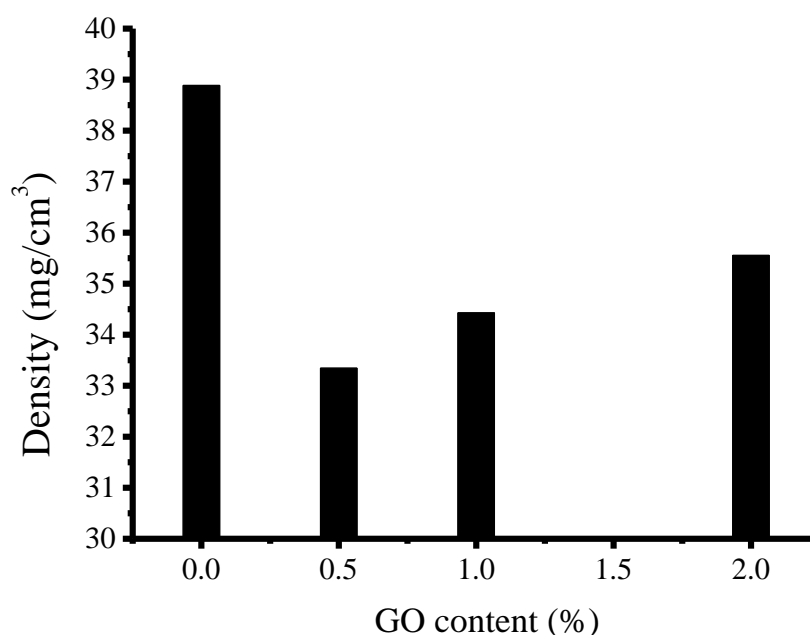

**Figure S1.** GIAs densities as a function of GO contents.

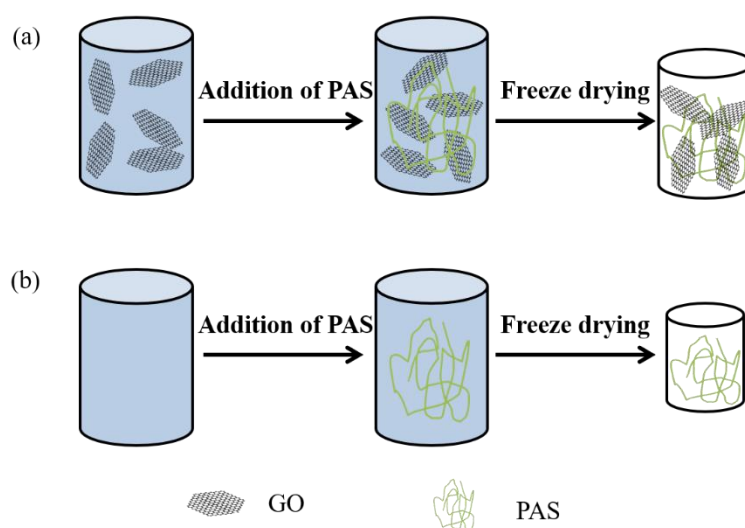

**Figure S2.** Schematic diagram of the freeze-drying processes of PAS solutions with GO (a) and without GO (b).

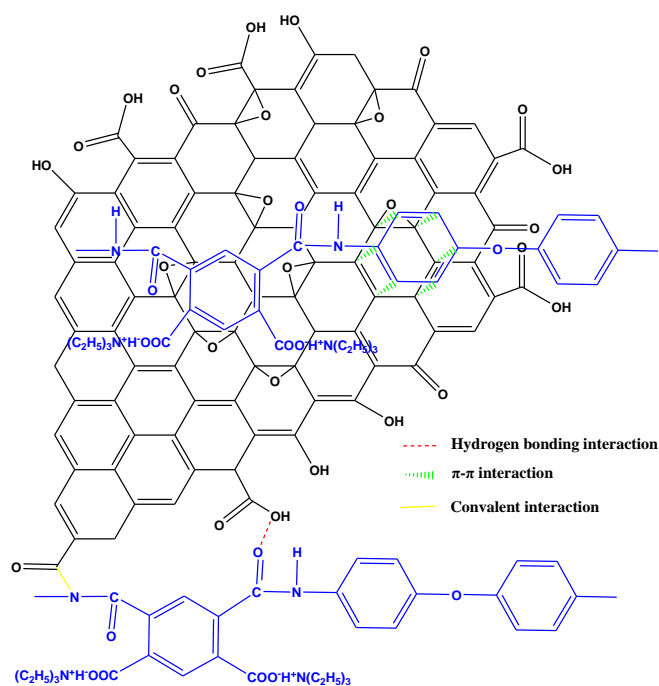

**Figure S3.** Schematic of the interactions that might exist between GO and PAS.

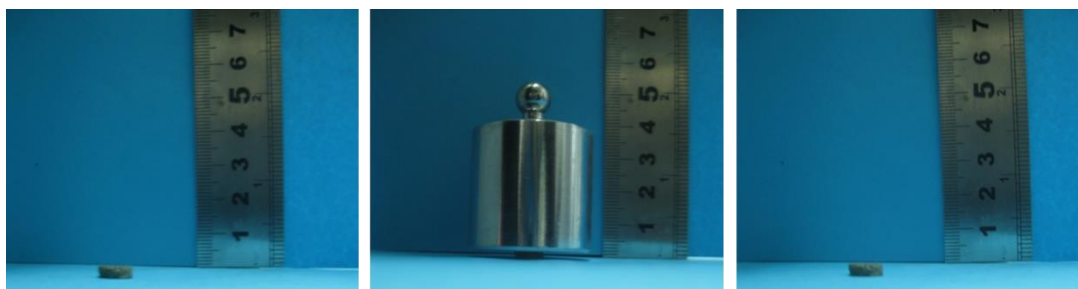

**Figure S4.** A GIA<sub>1</sub> with a weight of 6.4 mg (left); the same sample supporting a 200g poise (middle) that is 31250 times its own weight; the same sample after remove of the poise (right).

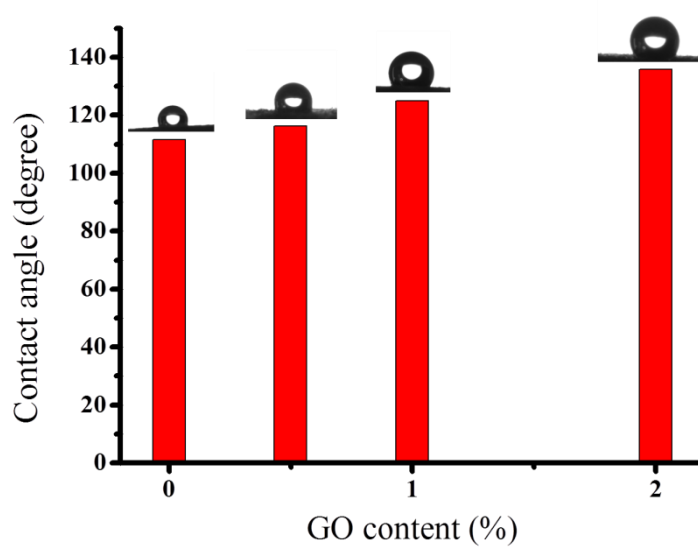

**Figure S5.** Water contact angles of GIAs as a function of GO contents.

**Table S1.** Surface tensions of organic liquid/oil absorbed by GIAs.

| Organic liquid or oil | Surface tension<br>$\text{mN}\cdot\text{m}^{-1}$ | Reference |
|-----------------------|--------------------------------------------------|-----------|
| Ethanol               | 22.3                                             | 89        |
| Toluene               | 29                                               | 89        |
| Cyclohexane           | 24.3                                             | 89        |
| Rapeseed-oil          | 35                                               | 90        |
| Glycerol              | 63.4                                             | 91        |
